# Supplementary material
Source: publisher figshare collection journal article supplement (https://karger.figshare.com/ndownloader/files/13346540)
Supplement: Supplementary file 1 [file 13346540]

## **Supplementary Material**

# **The Differentially Expressed Circular RNAs in the Substantia Nigra and Corpus Striatum of Nrf2-Knockout Mice**

Jun-Hui Yang<sup>a</sup> Run-Jiao Zhang<sup>b</sup> Jia-Jie Lin<sup>c</sup> Ming-Chao Cao<sup>d</sup>  
Qie Wang<sup>b</sup> Hui-Xian Cui<sup>b</sup> Shao-Guang Sun<sup>c</sup> Lei Wang<sup>b</sup>

<sup>a</sup>Department of Neurology, Hospital of Jingxing county, <sup>b</sup>Department of Human Anatomy, Hebei Medical University, <sup>c</sup>Department of Biochemistry and Molecular Biology, Hebei Medical University,

<sup>d</sup>Department of rehabilitation, The second hospital of Hebei Medical University

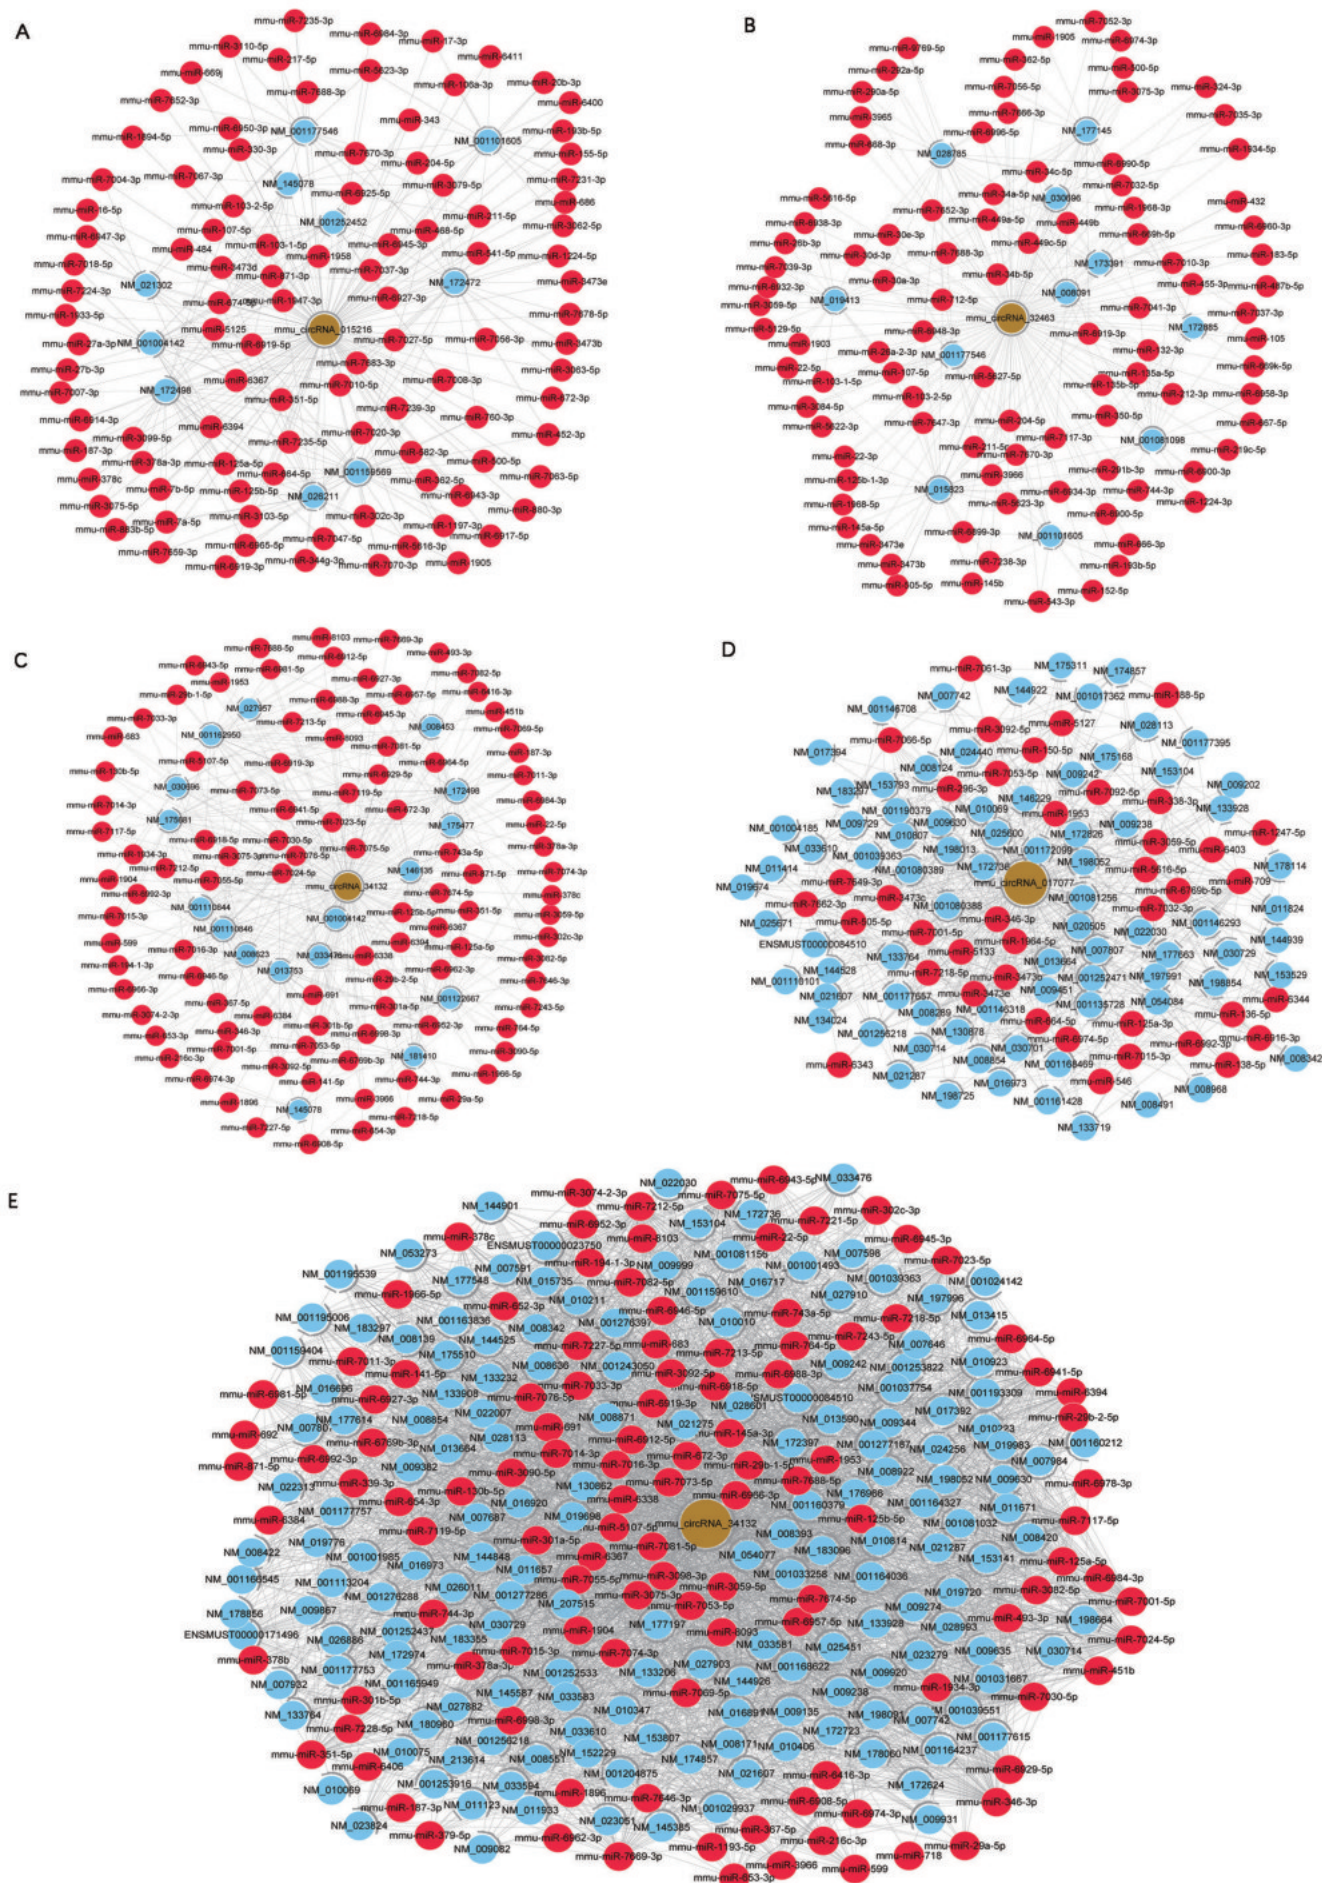

**Figure S1. DEcircRNA-miRNA-DEceRNA interaction subnetworks of mmu\_circRNA\_015216, mmu\_circRNA\_32463 and mmu\_circRNA\_34132 in Nrf2 (-/-) substantia nigra and DEcircRNA-miRNA-DEceRNA interaction subnetworks of mmu\_circRNA\_017077 and mmu\_circRNA\_34132 in Nrf2 (-/-) corpus striatum.**

(A). Subnetwork of mmu\_circRNA\_015216 in Nrf2 (-/-) substantia nigra; (B). Subnetwork of mmu\_circRNA\_32463 in Nrf2 (-/-) substantia nigra; (C). Subnetwork of mmu\_circRNA\_34132 in Nrf2 (-/-) substantia nigra; (D). Subnetwork of mmu\_circRNA\_017077 in Nrf2 (-/-) corpus striatum; (E). Subnetwork of mmu\_circRNA\_34132 in Nrf2 (-/-) corpus striatum.

Brown nodes indicated DEcircRNAs. Red and blue nodes indicated miRNAs targeted by DEcircRNAs and the gene ID of their DEceRNAs, respectively. Edges represented interactions.
